# Supplementary material for: Enhanced Visible Light Photocatalytic Activity ofV2O5Cluster Modified N-DopedTiO2for Degradation of Toluene in Air
Source: Hindawi journal article supplement (doi:10.1155/2012/569716), 2012-01-01
Supplement: f1 [file 569716.f1.doc]

**Supplementary Materials for**

**Enhanced visible light photocatalytic activity of V2O5 cluster modified N-doped TiO2 for degradation of toluene in air**

Fan Dong,*,a Yanjuan Sun a and Min Fu a

College of Environmental and Biological Engineering, Key Laboratory of Catalysis Science and Technology of Chongqing Education Commission, Chongqing Technology and Business University, Chongqing, 400067, China.

Email: dfctbu@126.com


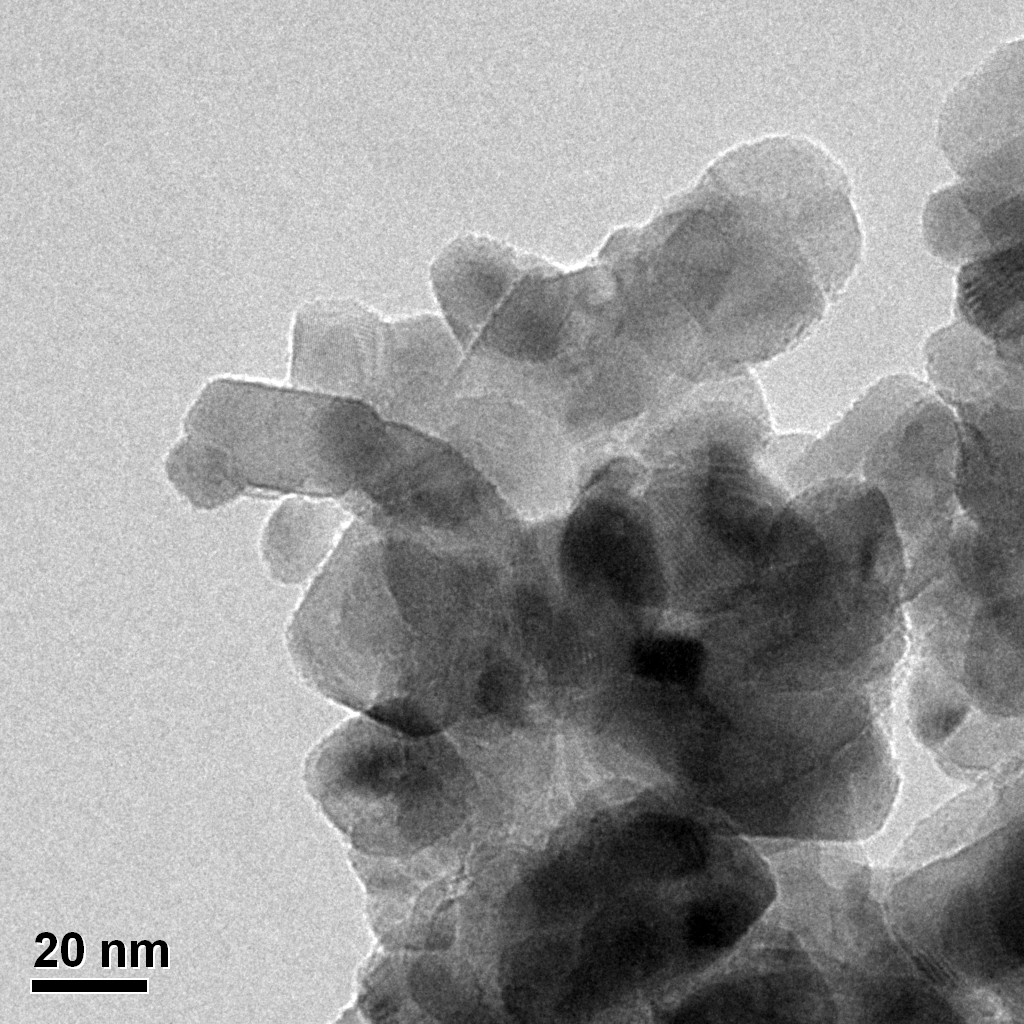


FIGURE S1 Enlarged view of V2O5 cluster modified N-doped TiO2.
